# Supplementary material for: Copolymerization synthesis of highly hydrophilic carbon nitride for efficient solar hydrogen production
Source: Royal Society of Chemistry journal article supplement (doi:10.1039/d3ta00670k), 2023-01-01
Supplement: d3ta00670k1.pdf [file d3ta00670k1.pdf]

## Supporting Information

### **Copolymerization Synthesis of Highly Hydrophilic Carbon Nitride for Efficient Solar Hydrogen Production**

Yaping Jian, Yuanyong Huang, Baodong Mao, Di Li, Bifu Luo, Min Chen, Dongbo

Xu\*, Weidong Shi \*

School of Chemistry and Chemical Engineering, Jiangsu University, Zhenjiang

212013, P.R. China.

E-mail Address: [xudb39@ujs.edu.cn](mailto:xudb39@ujs.edu.cn) (D. Xu), [swd1978@ujs.edu.cn](mailto:swd1978@ujs.edu.cn) (W. Shi)

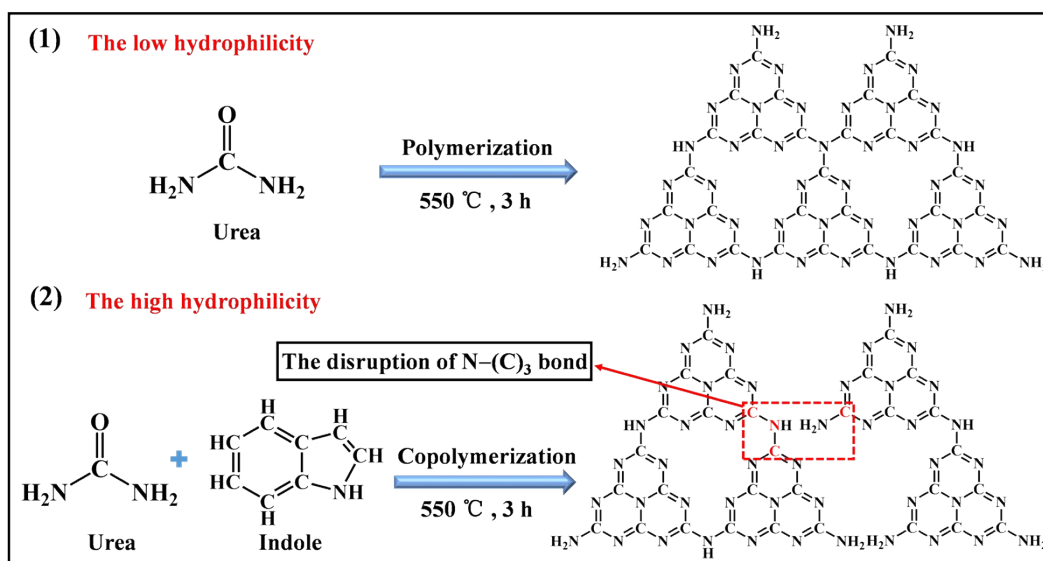

**Fig. S1.** Diagram for the synthesis of PCN and PCNInd<sub>x</sub>.

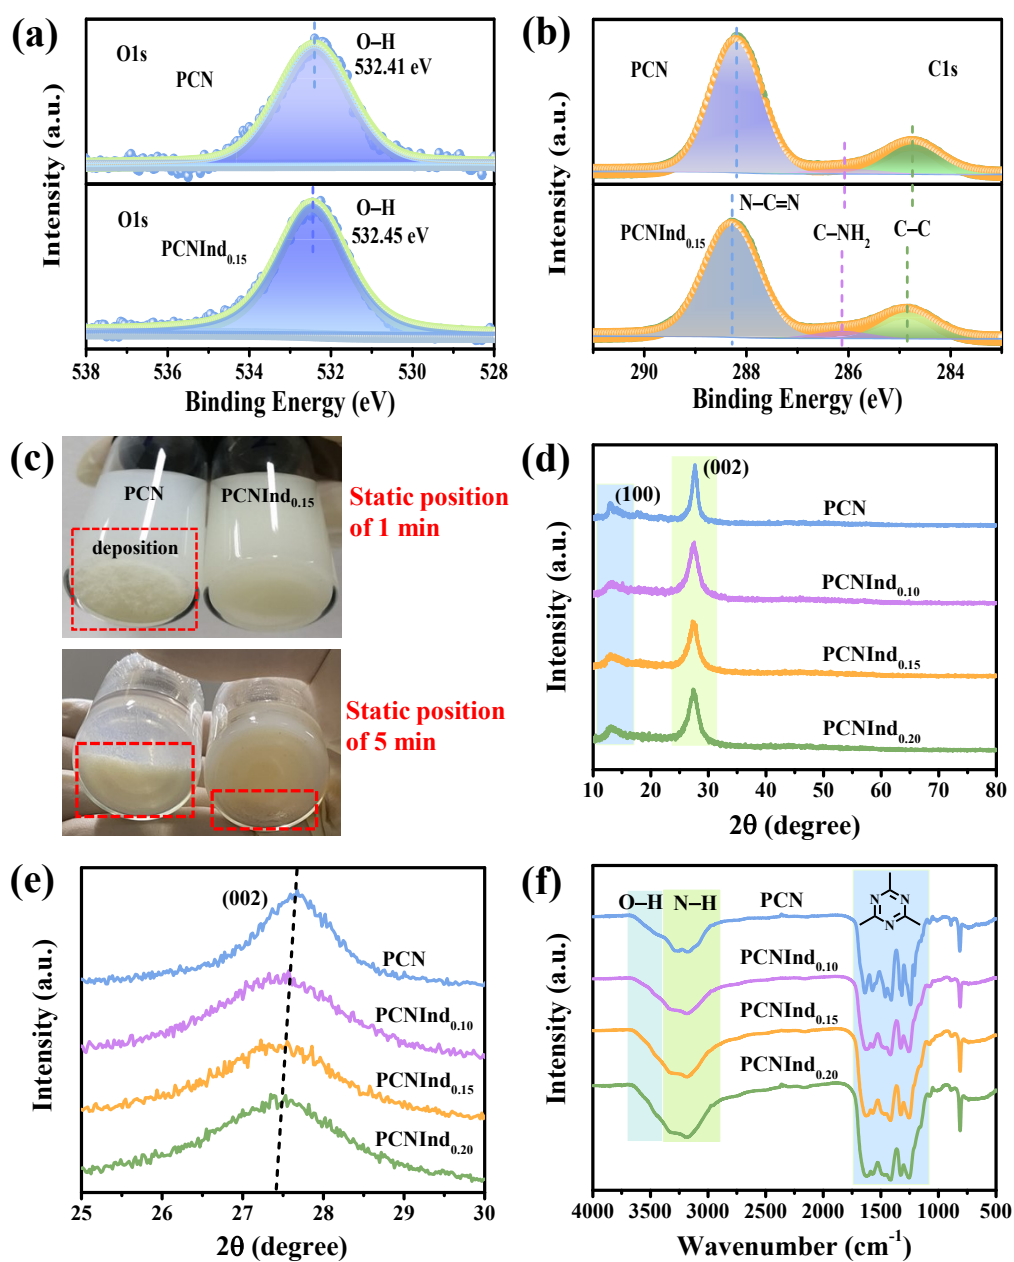

**Fig. S2.** (a) The O1s XPS analysis; (b) the C1s XPS analysis; (c) the photos of dispersion states on aqueous solutions for PCN after sonication of 30 min and PCNInd<sub>0.15</sub> after sonication of 5 min until standing for 1 min and 5 min later, respectively; (d) the XRD patterns; (e) the enlarged XRD spectra of the as-prepared samples; (f) FT-IR spectra.

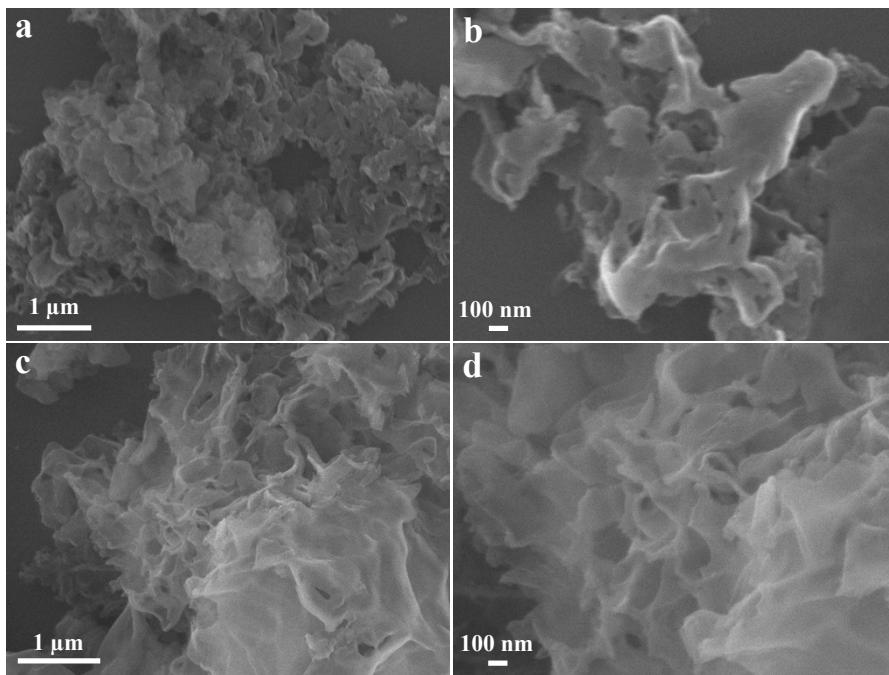

**Fig. S3.** SEM of PCN (a and b) and PCNInd<sub>0.15</sub> (c and d).

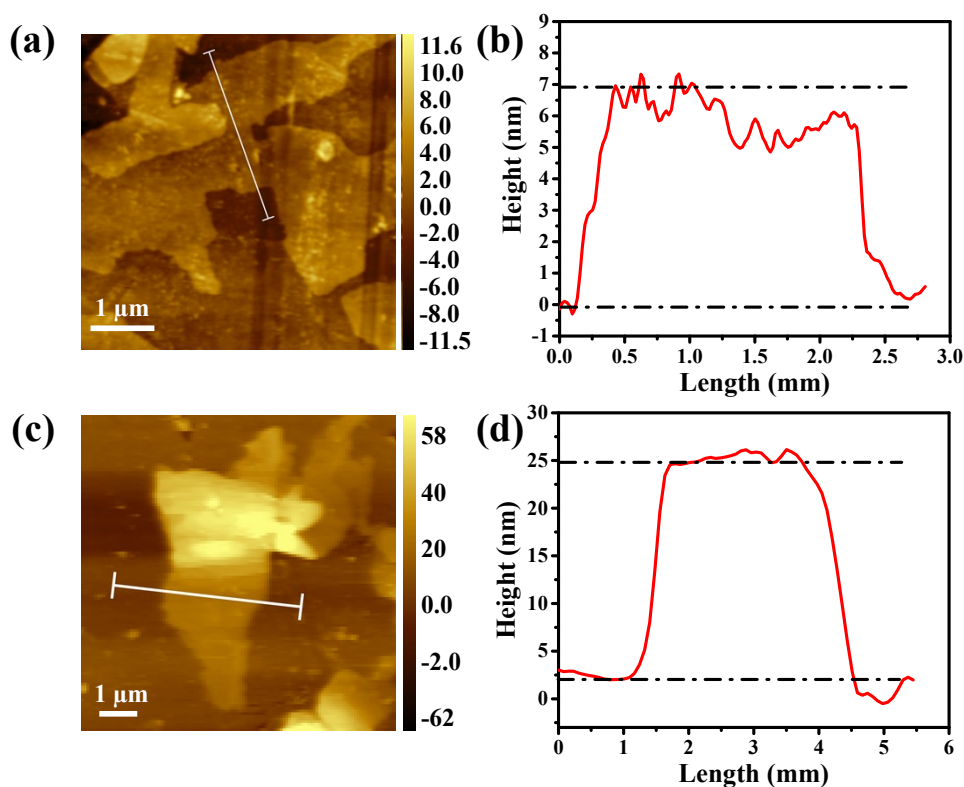

**Fig. S4.** (a and b) Typical AFM image and its height curve determined along the white line of PCN, respectively; (c and d) typical AFM image and its height curve determined along the white line of PCNInd<sub>0.15</sub>, respectively.

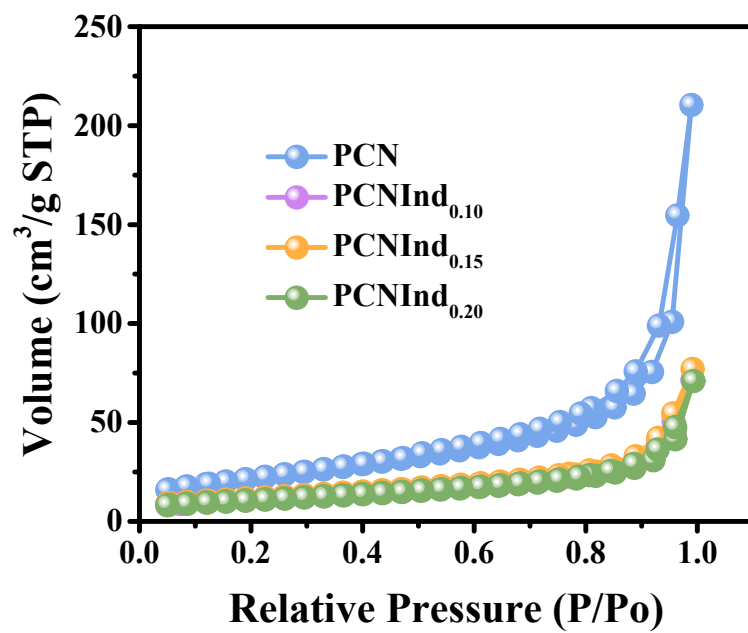

Fig. S5. N<sub>2</sub> adsorption/desorption isotherms of samples.

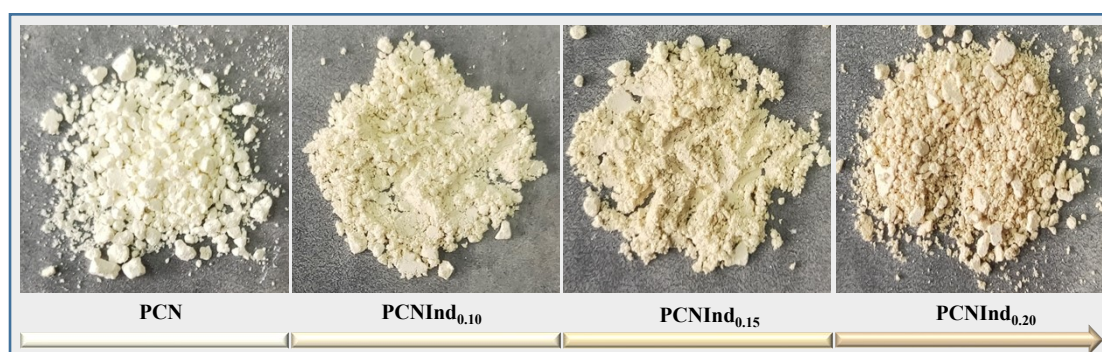

Fig. S6. The change in color of PCN with increasing amount of indole.

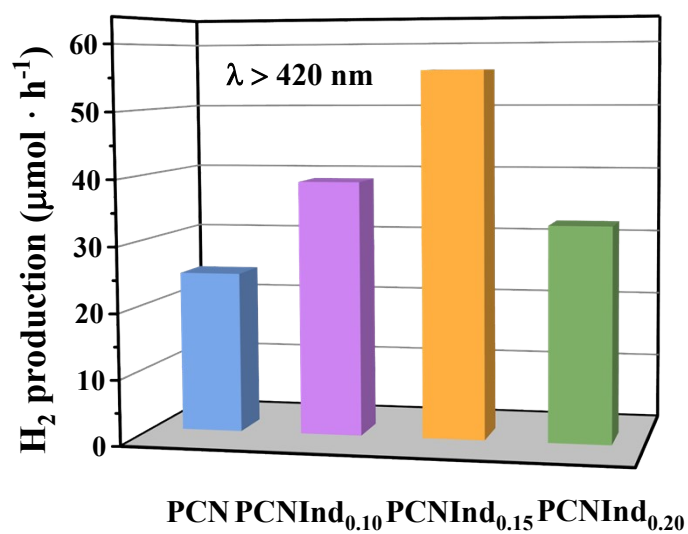

Fig. S7. H<sub>2</sub> production rate ( $\lambda > 420$  nm).

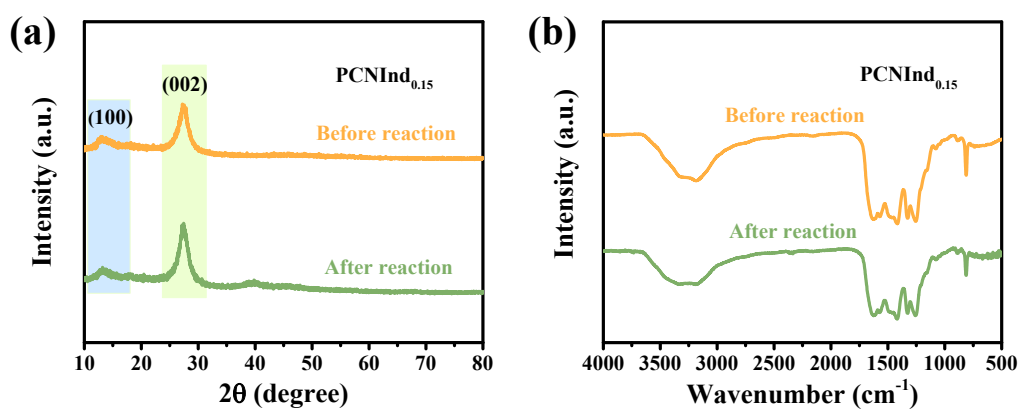

**Fig. S8.** (a) XRD pattern of PCNInd<sub>0.15</sub> before and after reaction; (b) FT-IR spectra of PCNInd<sub>0.15</sub> before and after reaction.

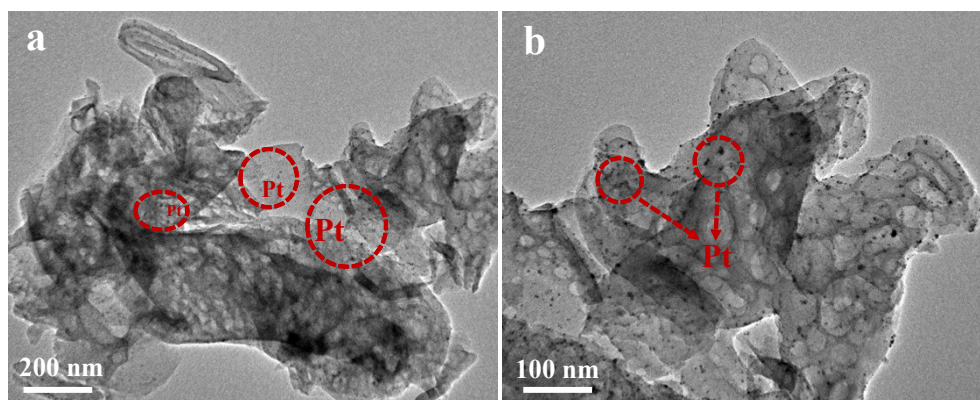

**Fig. S9.** TEM of PCNInd<sub>0.15</sub> after reaction.

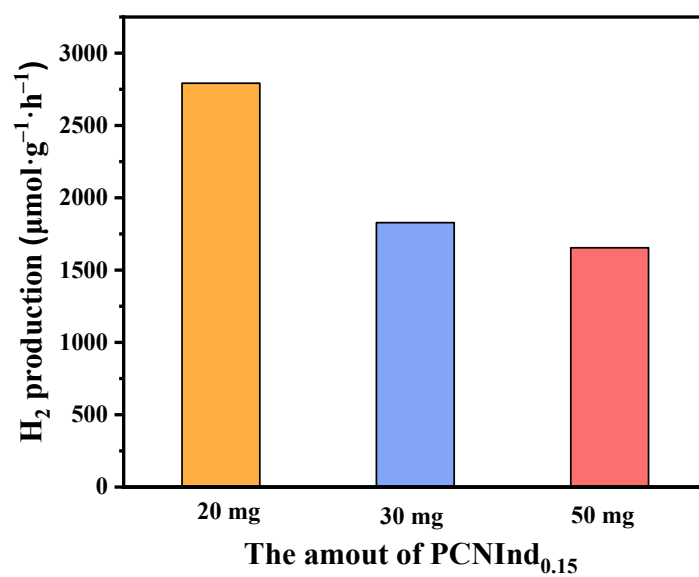

**Fig. S10.** The effect of photocatalysts amount on photocatalytic activity.

**Table S1.** Elemental analysis of PCN and PCNInd<sub>0.15</sub>.

| Elemental analysis     |          |          |          |                    |
|------------------------|----------|----------|----------|--------------------|
| Sample                 | C (wt.%) | N (wt.%) | H (wt.%) | C/N (atomic ratio) |
| PCN                    | 34.15    | 59.76    | 2.06     | 0.67               |
| PCNInd <sub>0.15</sub> | 33.20    | 60.09    | 2.36     | 0.64               |

**Table S2.** EDS of PCN and PCNInd<sub>0.15</sub>.

| Elemental analysis     |          |          |          |                    |
|------------------------|----------|----------|----------|--------------------|
| Sample                 | C (wt.%) | N (wt.%) | O (wt.%) | C/N (atomic ratio) |
| PCN                    | 31.85    | 51.40    | 16.76    | 0.72               |
| PCNInd <sub>0.15</sub> | 30.87    | 53.36    | 15.77    | 0.67               |

**Table S3.** Summary of the previously reported hydrophilic PCN with regard to synthesis process.

| Sample <sup>a</sup>                                                                        | Precursors                                                    | E <sub>g</sub> (eV) | Application                               | Water contact angle (°) | Synthetic methods                                                                                                                                                                                                                                                                     | Synthetic steps | Ref.                                                           |
|--------------------------------------------------------------------------------------------|---------------------------------------------------------------|---------------------|-------------------------------------------|-------------------------|---------------------------------------------------------------------------------------------------------------------------------------------------------------------------------------------------------------------------------------------------------------------------------------|-----------------|----------------------------------------------------------------|
| Fe(OH) <sub>3</sub> /PCN composite membrane                                                | PCN NSs + Fe(OH) <sub>3</sub> + Anodic aluminum oxide support | ---                 | Water purification                        | 68.5                    | Preparation of PCN NSs (polymerization + calcination + ultrasonic treatment) + Preparation of Fe(OH) <sub>3</sub> nanoparticles + Fabrication of membranes (the deposition of g-C <sub>3</sub> N <sub>4</sub> nanosheets layer + the deposition of Fe(OH) <sub>3</sub> nanoparticles) | Six             | [1] <i>J. Membrane Sci.</i> , 2018, <b>564</b> , 372–381       |
| Oxygen-containing and amino groups functional carbon nitride atomically-thin porous sheets | Bulk PCN                                                      | 2.96                | Photocatalytic H <sub>2</sub> evolution   | 28.45                   | Calcination + Continuous secondary calcination + Calcination under the flowing air + Calcination under NH <sub>3</sub>                                                                                                                                                                | Four            | [2] <i>Energy Environ. Sci.</i> , 2018, <b>11</b> , 566–571    |
| Plasma-treated PCN                                                                         | PCN                                                           | 2.86                | Photocatalytic degradation of Rhodamine B | 51.8                    | Polymerization + Plasma treatment                                                                                                                                                                                                                                                     | Two             | [3] <i>Carbon</i> , 2017, <b>123</b> , 651–659                 |
| Soluble PCN NSs/PCN                                                                        | Soluble PCN NSs + PCN                                         | 2.70                | Photocatalytic H <sub>2</sub> evolution   | ---                     | Preparation of bulk PCN (polymerization) + Preparation of soluble PCN NSs (treatment at 180 °C +                                                                                                                                                                                      | Four            | [4] <i>Appl. Catal. B: Environ.</i> , 2019, <b>247</b> , 70–77 |

|                                                                                                        |                                                                           |                                          |                                                                                           |            |                                                                                                                                                                                                                                                                                                                           |       |                                                                  |                                                                                             |  |
|--------------------------------------------------------------------------------------------------------|---------------------------------------------------------------------------|------------------------------------------|-------------------------------------------------------------------------------------------|------------|---------------------------------------------------------------------------------------------------------------------------------------------------------------------------------------------------------------------------------------------------------------------------------------------------------------------------|-------|------------------------------------------------------------------|---------------------------------------------------------------------------------------------|--|
|                                                                                                        |                                                                           |                                          |                                                                                           |            |                                                                                                                                                                                                                                                                                                                           |       |                                                                  | vacuum freeze-drying treatment) + Preparation of soluble PCN NSs/PCN (ultrasonic treatment) |  |
| G-C <sub>3</sub> N <sub>4</sub> -COOH                                                                  | g-C <sub>3</sub> N <sub>4</sub> NSs + Chloroacetic acid                   | ---                                      | Reverse osmosis desalination                                                              | 58.5 ± 1.2 | Polymerization + Functionalization reaction                                                                                                                                                                                                                                                                               | Two   | [5] <i>Sep. Purif. Technol.</i> , 2020, <b>235</b> , 116134      |                                                                                             |  |
| Porous PCN NSs                                                                                         | PCN                                                                       | 2.76                                     | Photocatalytic H <sub>2</sub> evolution                                                   | 48         | Polymerization + Calcination                                                                                                                                                                                                                                                                                              | Two   | [6] <i>Mater. Today Chem.</i> , 2022, <b>26</b> , 101084         |                                                                                             |  |
| Functional carbon nitride with amphiphilic carbon and C–O–C chain linked melem units                   | Melem + Formaldehyde                                                      | 2.52                                     | Photocatalytic H <sub>2</sub> evolution and photocatalytic selective oxidation of sulfide | 39.8       | Calcination + Purification of melem + Formaldehyde treatment + Calcination                                                                                                                                                                                                                                                | Four  | [7] <i>J. Mater. Chem. A</i> , 2021, <b>9</b> , 21732–21740      |                                                                                             |  |
| Microporous carbon nitride (C <sub>3</sub> N <sub>5.4</sub> ) with tetrazine based molecular structure | Aminoguanidine + Ultra-stable Y zeolite                                   | 2.27                                     | Adsorption of CO <sub>2</sub> and water                                                   | ---        | Pretreatment of aminoguanidine + Polymerization + Treating with 5 wt.% hydrofluoric acid                                                                                                                                                                                                                                  | Three | [8] <i>Angew. Chem. Int. Ed.</i> , 2021, <b>60</b> , 21242–21249 |                                                                                             |  |
| S-doped carbon nitride/graphene oxide 3D hierarchical framework                                        | S-doped g-C <sub>3</sub> N <sub>4</sub> + Large flake size graphene oxide | ---                                      | Mercury removal from desulfurization slurry                                               | 42         | Preparation of S doped carbon nitride (S-doped g-C <sub>3</sub> N <sub>4</sub> ) (pretreatment of melamine + calcination) + Fabrication of large flake size graphene oxide (LGO) (centrifugal classification method) + Preparation of S-doped g-C <sub>3</sub> N <sub>4</sub> /LGO aerogel (SGA) (hydrothermal treatment) | Four  | [9] <i>Sep. Purif. Technol.</i> , 2020, <b>239</b> , 116515      |                                                                                             |  |
| Interfacial coupling perovskite CeFeO <sub>3</sub> on layered graphitic carbon nitride                 | Melamine + a mixed Fe and Ce solution and NH <sub>4</sub> OH              | PCN (2.85) and CeFeO <sub>3</sub> (1.96) | Nitrogen fixation and organic pollutants demineralization                                 | 65.5       | Co-precipitation + Calcination                                                                                                                                                                                                                                                                                            | Two   | [10] <i>Chem. Eng. J.</i> , 2022, <b>427</b> , 131406            |                                                                                             |  |
| GCN (graphite phase carbon nitride)-SA (sulfuric acid) membrane                                        | GCN-SA                                                                    | ---                                      | Selective permeation                                                                      | 24         | Preparation of pristine GCN NSs (polymerization + ultrasonic treatment) + Preparation of GCN-SA composite (heating treatment with SA) + Preparation of membranes (vacuum filtration method)                                                                                                                               | Four  | [11] <i>Nat. Commun.</i> , 2019, <b>10</b> , 2500                |                                                                                             |  |
| PCN with surface N-hydroxymethylation                                                                  | PCN                                                                       | 2.79                                     | Photocatalytic H <sub>2</sub> O <sub>2</sub> production                                   | 52.5       | Polymerization + Ultrasonic washing at 80 °C + Being treated by formaldehyde solution                                                                                                                                                                                                                                     | Three | [12] <i>Adv. Funct. Mater.</i> , 2022, <b>32</b> , 2111125       |                                                                                             |  |
| Superficial hydroxyl and amino groups synergistically                                                  | PCN                                                                       | ---                                      | CO <sub>2</sub> electroreduction                                                          | 22.5       | Polymerization + Calcination under the flowing air + Calcination under the                                                                                                                                                                                                                                                | Three | [13] <i>ACS Catal.</i> , 2019, <b>9</b> , 10983–10989            |                                                                                             |  |



|                                   |                          |      |                                                                                         |       |                                                                                                                                                                                                                                      |      |                                                                                           |
|-----------------------------------|--------------------------|------|-----------------------------------------------------------------------------------------|-------|--------------------------------------------------------------------------------------------------------------------------------------------------------------------------------------------------------------------------------------|------|-------------------------------------------------------------------------------------------|
| active PCN                        |                          |      |                                                                                         |       | NH <sub>3</sub>                                                                                                                                                                                                                      |      |                                                                                           |
| Loofah-like carbon nitride sponge | Supramolecular precursor | 2.92 | Photocatalytic transfer hydrogenation of nitrophenols with water as the hydrogen source | 47    | Preparation of supramolecular precursor (microwave irradiation under 180 °C + stirring, filtering, washing and drying + treatment with cyanuric acid) + Preparation of loofah-like carbon nitride sponge (calcination + calcination) | Five | [14] <i>Chem. Eng. J.</i> , 2022, <b>444</b> , 136430                                     |
| Multiple Doped Carbon Nitrides    | Dicyandiamide + NaI      | 2.63 | Photocatalytic H <sub>2</sub> evolution                                                 | 44.12 | Calcination                                                                                                                                                                                                                          | One  | [15] <i>ACS Appl. Mater. Interfaces</i> , 2019, <b>11</b> , 22255–22263 Our previous work |
| PCNInd <sub>0.15</sub>            | Urea + Indole            | 2.62 | Photocatalytic H <sub>2</sub> evolution                                                 | 39.9  | Copolymerization                                                                                                                                                                                                                     | One  | <b>This work</b>                                                                          |

<sup>a</sup> PCN denotes polymer carbon nitride; NSs denotes nanosheets and “---” denotes no applicable.

**Table S4.** A set of control parameters were carried out as follows. Entry 14 displayed the optimized conditions.

| Entry                                                       | The content of Pt | PCNInd <sub>0.15</sub> (mg) | pH of the solution | Sacrificial agent | Wavelength (nm) | Activity (μmol·h <sup>-1</sup> ) |
|-------------------------------------------------------------|-------------------|-----------------------------|--------------------|-------------------|-----------------|----------------------------------|
| <b>pH dependence (Sodium hydroxide solution regulation)</b> |                   |                             |                    |                   |                 |                                  |
| <b>1</b>                                                    | 2 wt%             | 20                          | 1                  | Lactic acid       | λ > 420         | 55.85                            |
| <b>2</b>                                                    | 2 wt%             | 20                          | 3                  | Lactic acid       | λ > 420         | 49.20                            |
| <b>3</b>                                                    | 2 wt%             | 20                          | 5                  | Lactic acid       | λ > 420         | 37.37                            |
| <b>4</b>                                                    | 2 wt%             | 20                          | 7                  | Lactic acid       | λ > 420         | 25.80                            |
| <b>5</b>                                                    | 2 wt%             | 20                          | 9                  | Lactic acid       | λ > 420         | 22.92                            |
| <b>Wavelength dependence</b>                                |                   |                             |                    |                   |                 |                                  |
| <b>6</b>                                                    | 2 wt%             | 20                          | 1                  | Lactic acid       | λ > 420         | 55.85                            |
| <b>7</b>                                                    | 2 wt%             | 20                          | 1                  | Lactic acid       | λ = 420         | 17.12                            |
| <b>8</b>                                                    | 2 wt%             | 20                          | 1                  | Lactic acid       | λ = 450         | 2.03                             |
| <b>9</b>                                                    | 2 wt%             | 20                          | 1                  | Lactic acid       | λ = 500         | 0.17                             |
| <b>Pt cocatalyst dependence</b>                             |                   |                             |                    |                   |                 |                                  |
| <b>10</b>                                                   | 0.5 wt%           | 20                          | 1                  | Lactic acid       | λ > 420         | 26.34                            |

|           |       |    |   |             |                 |       |
|-----------|-------|----|---|-------------|-----------------|-------|
| <b>11</b> | 1 wt% | 20 | 1 | Lactic acid | $\lambda > 420$ | 33.12 |
| <b>12</b> | 2 wt% | 20 | 1 | Lactic acid | $\lambda > 420$ | 55.85 |
| <b>13</b> | 3 wt% | 20 | 1 | Lactic acid | $\lambda > 420$ | 49.86 |
| <b>14</b> | 5 wt% | 20 | 1 | Lactic acid | $\lambda > 420$ | 38.58 |

## References

- 1 Y. J. Wang, L. F. Liu, J. D. Hong, J. Cao and C. L. Deng, *J. Membrane Sci.*, 2018, **564**, 372–381.
- 2 N. N. Meng, J. Ren, Y. Liu, Y. Huang, T. Petit and B. Zhang, *Energy Environ. Sci.*, 2018, **11**, 566–571.
- 3 Z. Y. Mao, J. J. Chen, Y. F. Yang, L. J. Bie, B. D. Fahlman and D. J. Wang, *Carbon*, 2017, **123**, 651–659.
- 4 X. H. Wu, X. F. Wang, F. Z. Wang and H. G. Yu, *Appl. Catal. B: Environ.*, 2019, **247**, 70–77.
- 5 S. S. Shahabi, N. Azizi, V. Vatanpour and N. Yousefimehr, *Sep. Purif. Technol.*, 2020, **235**, 116134.
- 6 L. Bao, Y. Liu, Z. Yu, Y. Xue, S. Yan and H. Gao, *Mater. Today Chem.*, 2022, **26**, 101084.
- 7 S. L. Yang, Q. Wang, Q. C. Wang, G. Li, T. X. Zhao, P. Chen, F. Liu and S.-F. Yin, *J. Mater. Chem. A*, 2021, **9**, 21732–21740.
- 8 C. I. Sathish, S. Premkumar, X. Z. Chu, X. J. Yu, M. B. H. Breese, M. Al-Abri, A. H. Al-Muhtaseb, A. Karakoti, J. B. Yi and A. Vinu, *Angew. Chem. Int. Ed.*, 2021, **60**, 21242–21249.

- 9 M. Li, B. Wang, M. Q. Yang, Q. H. Li, D. G. Calatayud, S. H. Zhang, H. Y. Wang, L. D. Wang and B. Y. Mao, *Sep. Purif. Technol.*, 2020, **239**, 116515.
- 10 C. E. Choong, C. M. Park, Y.-Y. Chang, J.-K. Yang, J. R. Kim, S.-E. Oh, B.-H. Jeon, E. H. Choi, Y. Yoon and M. Jang, *Chem. Eng. J.*, 2022, **427**, 131406.
- 11 Y. Wang, N. N. Wu, Y. Wang, H. Ma, J. X. Zhang, L. L. Xu, M. K. Albolkany and B. Liu, *Nat. Commun.*, 2019, **10**, 2500.
- 12 B. Y. Liu, J. Y. Du, G. L. Ke, B. Jia, Y. J. Huang, H. C. He, Y. Zhou and Z. G. Zou, *Adv. Funct. Mater.*, 2022, **32**, 2111125.
- 13 N. N. Meng, W. Zhou, Y. F. Yu, Y. Liu and B. Zhang, *ACS Catal.*, 2019, **9**, 10983–10989.
- 14 F. L. Yao, L. M. Dai, J. B. Bi, W. K. Xue, J. Y. Deng, C. C. Fang, L. T. Zhang, H. A. Zhao, W. Y. Zhang, P. Xiong, Y. S. Fu, J. W. Sun and J. W. Zhu, *Chem. Eng. J.*, 2022, **444**, 136430.
- 15 Z. Y. Fang, D. Li, R. J. Chen, Y. Y. Huang, B. F. Luo and W. D. Shi, *ACS Appl. Mater. Interfaces*, 2019, **11**, 22255–22263.
